# Supplementary material
Source: publisher figshare collection journal article supplement (https://gsajournals.figshare.com/ndownloader/files/16409174)
Supplement: Supplementary file 1 [file 16409174]

**Supplementary Table S3.** Gel results from Figures S4–S8 in table form.

2-Individual Test (Fig. S4)

| <b>Locus</b> | <b>Type</b>               | <b>Result</b>                   |
|--------------|---------------------------|---------------------------------|
| 1            | Male-specific candidate   | co-amplifies in male and female |
| 2            | Male-specific candidate   | co-amplifies in male and female |
| 3            | Male-specific candidate   | co-amplifies in male and female |
| 4            | Male-specific candidate   | co-amplifies in male and female |
| 5            | Male-specific candidate   | co-amplifies in male and female |
| 6            | Male-specific candidate   | co-amplifies in male and female |
| 7            | Male-specific candidate   | co-amplifies in male and female |
| 8            | Male-specific candidate   | co-amplifies in male and female |
| 9            | Female-specific candidate | female-specific amplification   |
| 10           | Female-specific candidate | female-specific amplification   |
| 11           | Female-specific candidate | co-amplifies in male and female |
| 12           | Female-specific candidate | female-specific amplification   |
| 13           | Female-specific candidate | co-amplifies in male and female |
| 14           | Female-specific candidate | female-specific amplification   |
| 15           | Female-specific candidate | co-amplifies in male and female |
| 16           | Female-specific candidate | female-specific amplification   |
| 17           | Female-specific candidate | co-amplifies in male and female |
| 18           | Female-specific candidate | co-amplifies in male and female |
| 19           | Female-specific candidate | female-specific amplification   |
| 20           | Female-specific candidate | co-amplifies in male and female |
| 21           | Female-specific candidate | co-amplifies in male and female |
| 22           | Female-specific candidate | co-amplifies in male and female |
| 23           | Female-specific candidate | female-specific amplification   |
| 24           | Female-specific candidate | co-amplifies in male and female |

|     |                           |                                 |
|-----|---------------------------|---------------------------------|
| 25  | Female-specific candidate | co-amplifies in male and female |
| 26  | Female-specific candidate | co-amplifies in male and female |
| 27  | Female-specific candidate | co-amplifies in male and female |
| 28  | Female-specific candidate | co-amplifies in male and female |
| 29  | Female-specific candidate | co-amplifies in male and female |
| 30  | Female-specific candidate | co-amplifies in male and female |
| 31  | Female-specific candidate | co-amplifies in male and female |
| 32  | Female-specific candidate | female-specific amplification   |
| 33  | Female-specific candidate | co-amplifies in male and female |
| 34  | Female-specific candidate | female-specific amplification   |
| 35  | Female-specific candidate | co-amplifies in male and female |
| 36  | Female-specific candidate | co-amplifies in male and female |
| 37  | Female-specific candidate | co-amplifies in male and female |
| 38  | Female-specific candidate | female-specific amplification   |
| 39  | Female-specific candidate | female-specific amplification   |
| 40  | Female-specific candidate | co-amplifies in male and female |
| 41  | Female-specific candidate | co-amplifies in male and female |
| 42  | Female-specific candidate | co-amplifies in male and female |
| 43  | Female-specific candidate | female-specific amplification   |
| 18S | positive control          | co-amplifies in male and female |

#### 10-Individual Test (Fig. S5)

| <b>Locus</b> | <b>Type</b>               | <b>Result</b>                                               |
|--------------|---------------------------|-------------------------------------------------------------|
| 9            | Female-specific candidate | female-specific amplification                               |
| 10           | Female-specific candidate | co-amplifies in male and female                             |
| 12           | Female-specific candidate | co-amplifies in male and female                             |
| 14           | Female-specific candidate | female-specific amplification ( <i>Cryptobranchus</i> only) |
| 16           | Female-specific candidate | co-amplifies in male and female                             |

|     |                           |                                                                                                    |
|-----|---------------------------|----------------------------------------------------------------------------------------------------|
| 19  | Female-specific candidate | co-amplifies in male and female                                                                    |
| 23  | Female-specific candidate | female-specific amplification of strong band, messy banding in males                               |
| 32  | Female-specific candidate | female-specific amplification of strong band in <i>Cryptobranchus</i> only, messy banding in males |
| 34  | Female-specific candidate | female-specific amplification                                                                      |
| 38  | Female-specific candidate | co-amplifies in male and female, possible sex-specific size difference                             |
| 39  | Female-specific candidate | co-amplifies in male and female                                                                    |
| 43  | Female-specific candidate | female-specific amplification of strong band in <i>Cryptobranchus</i> only, messy banding in males |
| 18S | positive control          | co-amplifies in male and female                                                                    |

23-Individual Test in Missouri *Cryptobranchus* (Fig. S6)

| Locus | Type                      | Result                          |
|-------|---------------------------|---------------------------------|
| 9     | Female-specific candidate | female-specific amplification   |
| 34    | Female-specific candidate | female-specific amplification   |
| 18S   | positive control          | co-amplifies in male and female |

18-Individual Test in Kentucky *Cryptobranchus* (Fig. S7)

| Locus | Type                      | Result                          |
|-------|---------------------------|---------------------------------|
| 9     | Female-specific candidate | female-specific amplification   |
| 34    | Female-specific candidate | female-specific amplification   |
| 18S   | positive control          | co-amplifies in male and female |

*Andrias* Test (Fig. S8)

| Locus | Type                      | Result                                     |
|-------|---------------------------|--------------------------------------------|
| 9     | Female-specific candidate | no amplification detected                  |
| 34    | Female-specific candidate | female-specific amplification              |
| 18S   | positive control          | co-amplifies in male and female except AD2 |
